# Supplementary material for: Aerosol-derived Ni1−xZnx electrocatalysts for direct hydrazine fuel cells
Source: Royal Society of Chemistry journal article supplement (doi:10.1039/c2cp40546f), 2012-01-01
Supplement: c2cp40546f.pdf [file c2cp40546f.pdf]

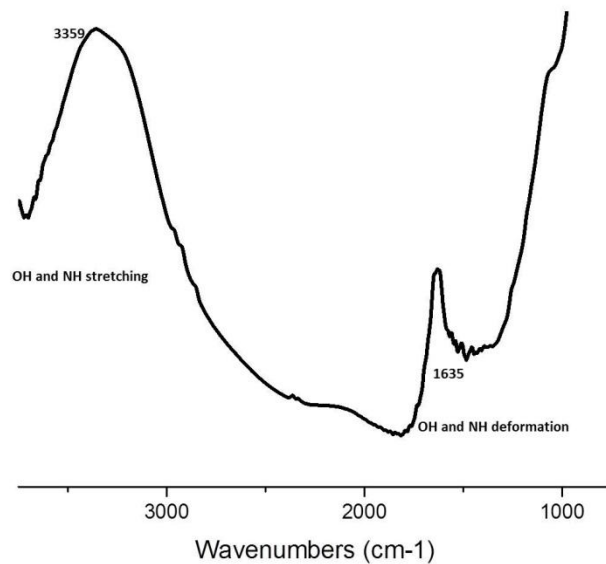

Fig. 1.  $\alpha$ -Ni<sub>0.87</sub>Zn<sub>0.13</sub> reference spectrum taken at -0.42 V (vs RHE).

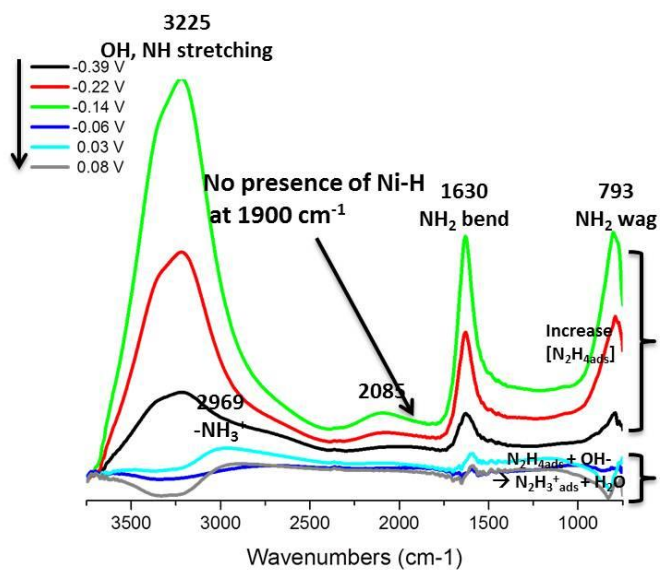

Fig. 2. *In situ* IRRAS of hydrazine oxidation on Ni. Ni-H is absent at 1900 cm<sup>-1</sup>.
